# Supplementary material
Source: MDPI journal article supplement (https://www.mdpi.com/2073-4433/15/5/588)
Supplement: s1 [file s1]

# Protective Effects of Resveratrol on Cytotoxicity of Mouse Hepatic Stellate Cells Induced by PM<sub>2.5</sub>

Mei Zhang, Shanshan Chen, Lirong Bai, Wenqi Chen, Ruijin Li

## Supplementary information

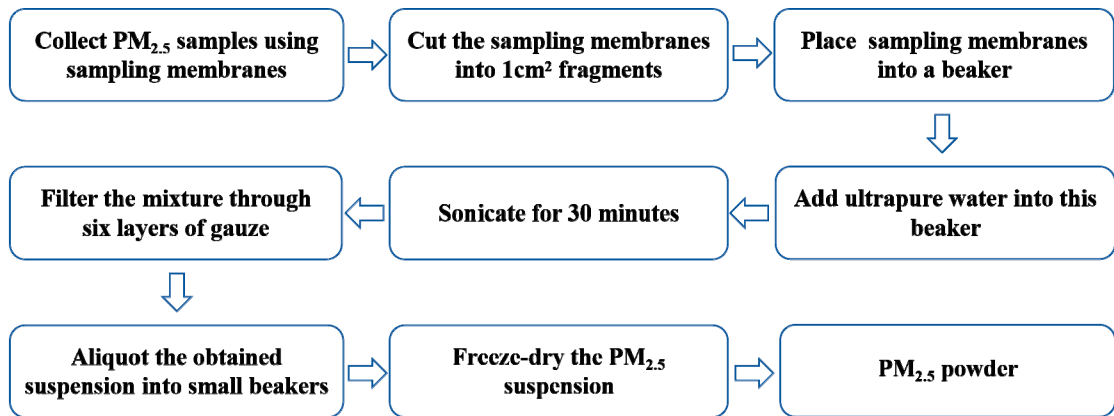

Figure S1 A flow chart for PM<sub>2.5</sub> preparation.
